# Supplementary material for: Phase I Trials of Anti-ENPP3 Antibody–Drug Conjugates in Advanced Refractory Renal Cell Carcinomas
Source: Oxford University Press journal article supplement (doi:10.1158/1078-0432.ccr-18-0481), 2018-05-30
Supplement: 10780432ccr180481-sup-196911_2_supp_4765744_p8w298.docx [file 10780432ccr180481-sup-196911_2_supp_4765744_p8w298.docx]

**SUPPLEMENTARY FIGURE LEGEND**

Supplementary Figure 1. Concentration time profiles for AGS-16M8F(Hyb) antibody drug conjugate (ADC) (data is presented as Mean ± SD)

Supplementary Figure 2. Serum concentration time profiles for AGS-16C3F(CHO) antibody drug conjugate (ADC) (data is presented as Mean ± SD)

Supplementary Figure 3. Serum concentration time profiles for AGS-16M8F(Hyb) free cys-mcMMAF (data is presented as Mean ± SD)

Supplementary Figure 4. Serum concentration time profiles for AGS-16C3F(CHO) free cys-mcMMAF (data is presented as Mean ± SD)

Supplementary Figure 5. Serum concentration time profiles for AGS-16M8F(Hyb) Total Antibody (TAb) (data is presented as Mean ± SD)

Supplementary Figure 6. Serum concentration time profiles for AGS-16C3F(CHO) Total Antibody (TAb) (data is presented as Mean ± SD)
